# Supplementary material for: High-affinity ligands of the colchicine domain in tubulin based on a structure-guided design
Source: PubMed Central journal article supplement (PMC5844890; doi:10.1038/s41598-018-22382-x), 2018-03-09
Supplement: 41598_2018_22382_MOESM1_ESM.pdf [file 41598_2018_22382_MOESM1_ESM.pdf]

**Electronic Supplementary Information related to the article**

## **High-affinity ligands of the colchicine domain in tubulin based on a structure-guided design**

Oskia Bueno, Juan Estévez Gallego, Solange Martins, Andrea E. Prota, Federico Gago, Asier Gómez SanJuan, María-José Camarasa, Isabel Barasoain, Michel O. Steinmetz, J. Fernando Díaz, María-Jesús Pérez-Pérez, Sandra Liekens<sup>c</sup> and Eva-María Priego<sup>\*</sup>

Includes:

Table S1. Data collection and refinement statistics

Figure S1. The T2R-TTL-TUB075 complex and ligand details

Figure S2. Established SAR for cyclohexanediones

References

**Table S1.** Data collection and refinement statistics.

|                                          | <b>T<sub>2</sub>R-TTL-TUB075</b>              | <b>T<sub>2</sub>R-TTL-TUB015</b>              |
|------------------------------------------|-----------------------------------------------|-----------------------------------------------|
| <b>Data collection<sup>a</sup></b>       |                                               |                                               |
| Space group                              | P2 <sub>1</sub> 2 <sub>1</sub> 2 <sub>1</sub> | P2 <sub>1</sub> 2 <sub>1</sub> 2 <sub>1</sub> |
| Cell dimensions                          |                                               |                                               |
| <i>a</i> , <i>b</i> , <i>c</i> (Å)       | 104.7, 157.5, 180.0                           | 104.8, 157.8, 180.0                           |
| Resolution (Å)                           | 49.45 – 2.15 (2.21 – 2.15)                    | 49.44 – 2.10 (2.15 – 2.10)                    |
| R <sub>meas</sub> (%)                    | 11.8 (257.7)                                  | 11.4 (228.1)                                  |
| R <sub>pim</sub> (%)                     | 3.4 (88.5)                                    | 3.3 (80.3)                                    |
| CC <sub>1/2</sub> <sup>b</sup>           | 99.9 (30.0)                                   | 99.9 (34.9)                                   |
| I/σ                                      | 16.5 (0.8)                                    | 16.7 (0.8)                                    |
| Completeness (%)                         | 99.5 (96.3)                                   | 98.5 (91.8)                                   |
| Redundancy                               | 12.5 (8.9)                                    | 12.3 (8.5)                                    |
| <b>Refinement</b>                        |                                               |                                               |
| Resolution (Å)                           | 49.45 – 2.15                                  | 49.44 – 2.10                                  |
| No. unique reflections                   | 161351                                        | 171487                                        |
| R <sub>work</sub> /R <sub>free</sub> (%) | 17.5 / 20.6                                   | 17.8 / 21.7                                   |
| Average B-factors (Å <sup>2</sup> )      |                                               |                                               |
| Complex                                  | 60.7                                          | 57.0                                          |
| Solvent                                  | 53.8                                          | 49.7                                          |
| Ligand (chain B/D)                       | 39.6 / 50.2                                   | 37.9/ 52.6                                    |
| Wilson B-factor                          | 42.5                                          | 39.7                                          |
| Root mean square deviation from ideality |                                               |                                               |
| Bond length (Å)                          | 0.004                                         | 0.003                                         |
| Bond angles (°)                          | 0.719                                         | 0.613                                         |
| Ramachandran statistics <sup>c</sup>     |                                               |                                               |
| Favored regions (%)                      | 98.20                                         | 97.9                                          |
| Allowed regions (%)                      | 1.8                                           | 2.1                                           |
| Outliers (%)                             | 0                                             | 0                                             |

<sup>a</sup>Highest shell statistics are in parentheses. <sup>b</sup>CC1/2= percentage of correlation between intensities from random half-datasets<sup>1</sup> <sup>c</sup>As defined by MolProbity<sup>2</sup>.

**A**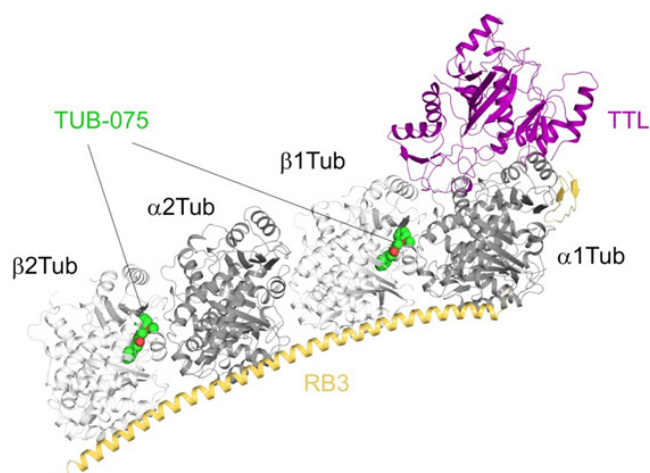**B**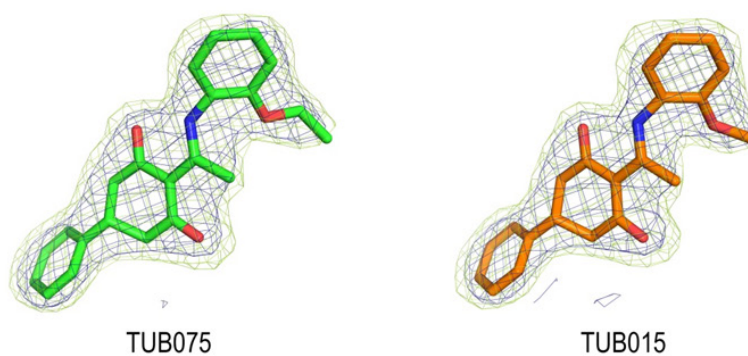

**Figure S1. The T<sub>2</sub>R-TTL-TUB075 complex and ligand details.** (A) Overall view of the T<sub>2</sub>R-TTL-TUB075 complex structure. The  $\alpha$ -tubulin and  $\beta$ -tubulin chains are in dark and light grey, TTL is in purple and RB3 is in yellow orange ribbon representation, respectively. The tubulin-bound TUB075 molecules are represented as green spheres, respectively. (B) Electron-density maps of both the TUB075 and TUB015 ligands bound to tubulin in their corresponding T<sub>2</sub>R-TTL complexes. The SigmaA-weighted 2mFo - DFc (dark blue mesh) and mFo - DFc (light green mesh) omit maps are contoured at +1.0 $\sigma$  and +3.0 $\sigma$ , respectively. The map calculations excluded the atoms of the TUB ligands.

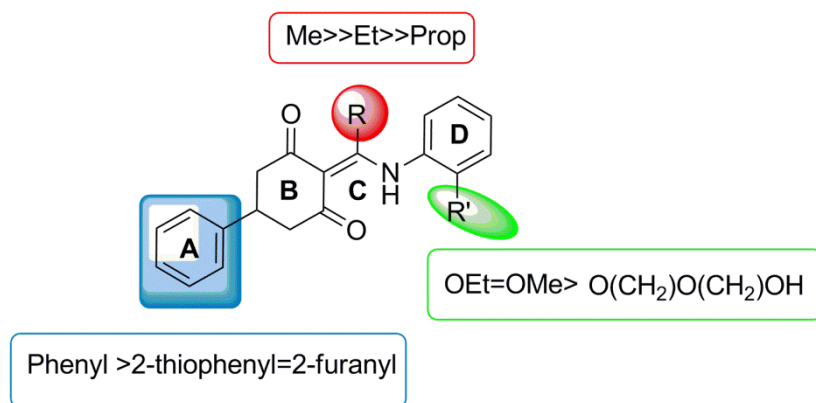

**Figure S2. Established SAR for cyclohexanediones.** Fragments of the cyclohexanedione derivatives and schematic representation of the most relevant structure-activity relationships established.<sup>3,4</sup>

## References

- 1 Karplus, P. A. & Diederichs, K. Linking crystallographic model and data quality. *Science* **336**, 1030-1033, (2012).
- 2 Davis, I. W., Murray, L. W., Richardson, J. S. & Richardson, D. C. MOLPROBITY: structure validation and all-atom contact analysis for nucleic acids and their complexes. *Nucleic acids research* **32**, W615-619, (2004).
- 3 Canela, M. D. *et al.* Novel colchicine-site binders with a cyclohexanedione scaffold identified through a ligand-based virtual screening approach. *J. Med. Chem.* **57**, 3924-3938, (2014).
- 4 Canela, M. D. *et al.* Targeting the colchicine site in tubulin through cyclohexanedione derivatives. *RSC Adv.* **6**, 19492-19506, (2016).
